# Supplementary material for: Investigation on Ground and Lining Response Due to Construction of a Horseshoe-Shaped Tunnel Considering Staged Excavation
Source: Research Square preprint supplement (doi:10.21203/rs.3.rs-7064460/v1), 2025-07-27
Supplement: Supplementary file 1 [file 4fbfd06be5c64a8890978a94.docx]

**Highlights**

- Different post-construction parameters of a horseshoe-shaped tunnel are investigated.
- The Mohr-Coulomb (MC) model significantly underestimates the ground and lining response as compared to the Hardening Soil (HS) model.
- Ground topography significantly influences the ground and lining responses.
- A significant increase in the transverse and longitudinal influence zone is observed when ground topography is considered in the analysis.
- The use of appropriate material properties, model, and construction methodology predicts the post-construction parameters with reasonable accuracy.
